# Supplementary material for: Effects of Kisspeptin-10 on Hypothalamic Neuropeptides and Neurotransmitters Involved in Appetite Control
Source: PubMed Central journal article supplement (PMC6321454; doi:10.3390/molecules23123071), 2018-11-24
Supplement: molecules-23-03071-s001.pdf [file molecules-23-03071-s001.pdf]

**Table S1**

|             | <b>Standard concentrations</b> |                    |                   |                     |
|-------------|--------------------------------|--------------------|-------------------|---------------------|
|             | <b>2.5 (ng/ml)</b>             | <b>5.0 (ng/ml)</b> | <b>10 (ng/ml)</b> | <b>20.0 (ng/ml)</b> |
| <b>NE</b>   | <b>1.79</b>                    | <b>2.58</b>        | <b>1.39</b>       | <b>0.51</b>         |
| <b>DA</b>   | <b>0.34</b>                    | <b>7.10</b>        | <b>5.32</b>       | <b>2.88</b>         |
| <b>5-HT</b> | <b>1.48</b>                    | <b>3.84</b>        | <b>0.10</b>       | <b>0.34</b>         |

**Table S1: Percentage relative standard deviation (RSD%) obtained from analysis of standard solutions of norepinephrine (NE), dopamine (DA) and serotonin (5-HT).**

**Table S2**

| <b>NE, DA, 5-HT</b> | <b>1.25 (ng/ml)</b>                                                  | <b>3.75 (ng/ml)</b>     | <b>11.00 (ng/ml)</b>       | <b>15.00 (ng/ml)</b>       |
|---------------------|----------------------------------------------------------------------|-------------------------|----------------------------|----------------------------|
|                     | <b>Resulting concentration calculated by linear regression curve</b> |                         |                            |                            |
| <b>NE, DA, 5-HT</b> | <b>1.25, 1.24, 1.24</b>                                              | <b>3.93, 3.85, 3.84</b> | <b>10.99, 11.25, 10.97</b> | <b>15.08, 15.03, 15.18</b> |
|                     | <b>Percentage variation</b>                                          |                         |                            |                            |
| <b>NE, DA, 5-HT</b> | <b>0, 0.8, 0.8</b>                                                   | <b>-4.8, -2.7, -2.4</b> | <b>0.1, -2.3, 0.3</b>      | <b>-0.5, -0.2, -1.2</b>    |

**Table S2: Mean percentage variations of standard solutions of norepinephrine (NE), dopamine (DA) and serotonin (5-HT), at four different concentrations calculated by linear regression curve.**

**Table S3**

|             |            | <b>Sample dilution</b> | <b>RSD%</b>  | <b>Mean concentration<br/>(ng/ml)</b> | <b>Recovery %</b> |
|-------------|------------|------------------------|--------------|---------------------------------------|-------------------|
| <b>NE</b>   | <b>LOQ</b> | <b>1:50</b>            | <b>7.42</b>  | <b>0.935</b>                          | <b>98.92</b>      |
| <b>NE</b>   | <b>LOD</b> | <b>1:100</b>           | <b>75.74</b> | <b>0.408</b>                          | <b>86.28</b>      |
| <b>DA</b>   | <b>LOQ</b> | <b>1:15</b>            | <b>0.11</b>  | <b>1.228</b>                          | <b>98.40</b>      |
| <b>DA</b>   | <b>LOD</b> | <b>1:30</b>            | <b>27.13</b> | <b>0.690</b>                          | <b>111.01</b>     |
| <b>5-HT</b> | <b>LOQ</b> | <b>1:100</b>           | <b>3.62</b>  | <b>1.295</b>                          | <b>101.27</b>     |
| <b>5-HT</b> | <b>LOD</b> | <b>1:200</b>           | <b>23.50</b> | <b>0.561</b>                          | <b>87.76</b>      |

**Table S3: The limits of quantitation (LOQ) and detection (LOD) of norepinephrine (NE), dopamine (DA) and serotonin (5-HT) were determined by analyses performed in triplicate on hypothalamic homogenate serially diluted in mobile phase. The LOQ is defined, for each analyte, as the lowest concentration showing a percentage relative standard deviation (RSD%)  $\leq 10$ .**

**Table S4**

|                   |                                   | <b>DA</b>    | <b>NE</b>    | <b>5-HT</b>  |
|-------------------|-----------------------------------|--------------|--------------|--------------|
| <b>10 ng/ml</b>   | <b>RSD%</b>                       | <b>2.74</b>  | <b>1.92</b>  | <b>1.61</b>  |
|                   | <b>Mean concentration (ng/ml)</b> | <b>9.57</b>  | <b>9.24</b>  | <b>9.81</b>  |
| <b>10.5 ng/ml</b> | <b>RSD%</b>                       | <b>1.07</b>  | <b>1.89</b>  | <b>1.52</b>  |
|                   | <b>Mean concentration (ng/ml)</b> | <b>10.42</b> | <b>10.39</b> | <b>10.30</b> |
| <b>11 ng/ml</b>   | <b>RSD%</b>                       | <b>1.02</b>  | <b>0.48</b>  | <b>0.65</b>  |
|                   | <b>Mean concentration (ng/ml)</b> | <b>11.27</b> | <b>11.26</b> | <b>11.29</b> |

**Table S4: Sensitivity analysis, performed by five injections of three standard solutions of norepinephrine (NE), dopamine (DA) and serotonin (5-HT), reveals that our method discriminates concentration differences of magnitude 0.5 ng/ml, with a percentage relative standard deviation (RSD%)  $\leq 10$ .**

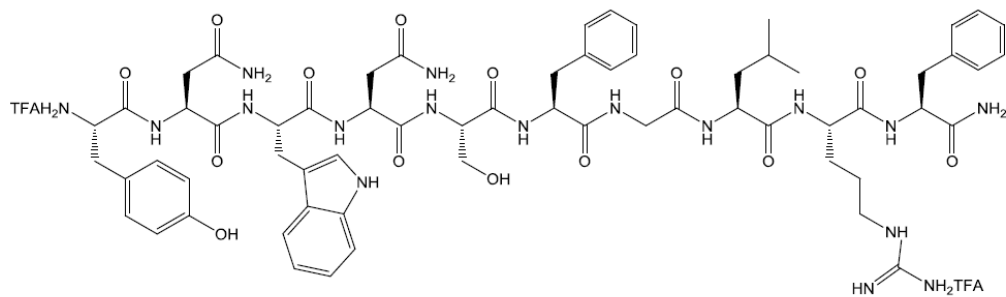

Figure S1: Structure of Kisspeptin-10.

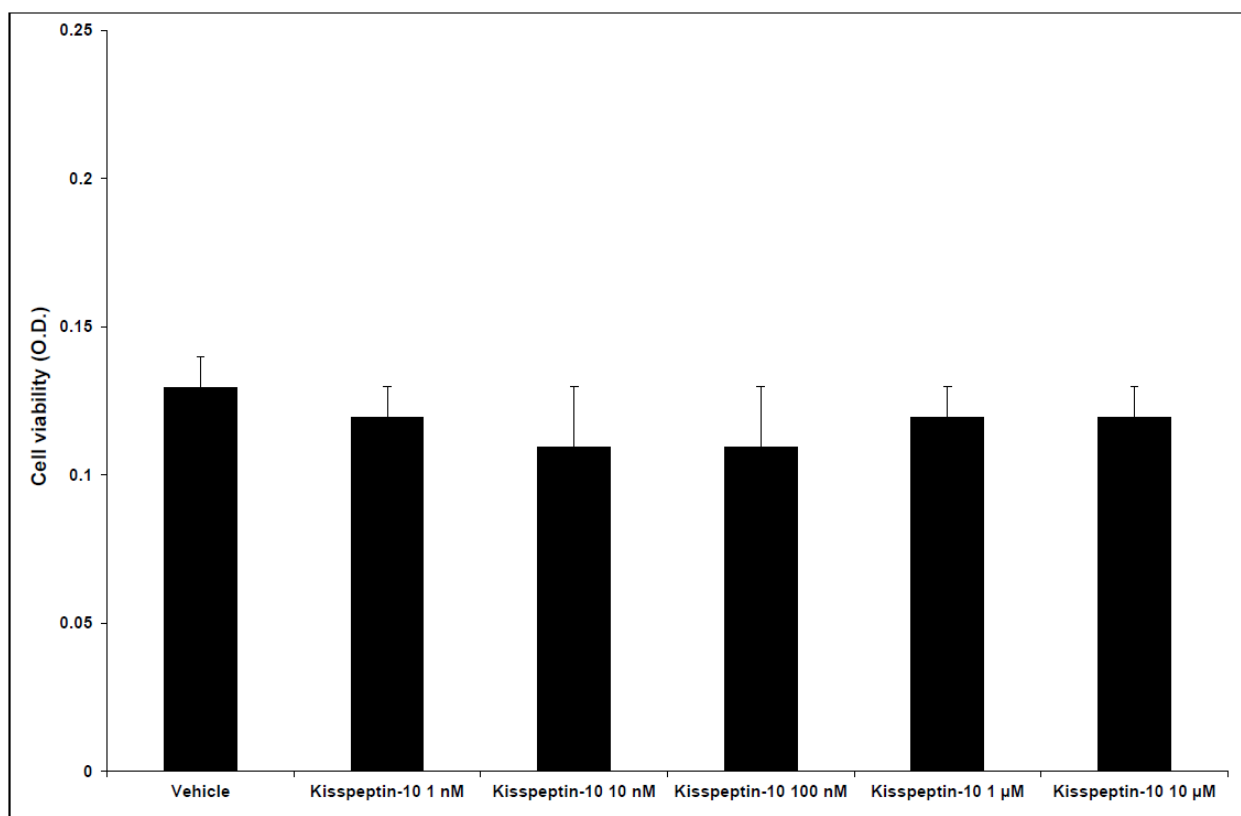

Figure S2: Effect of Kisspeptin-10 1nM-10 μM on hypothalamic hypoE22 cell line (MTT viability test).

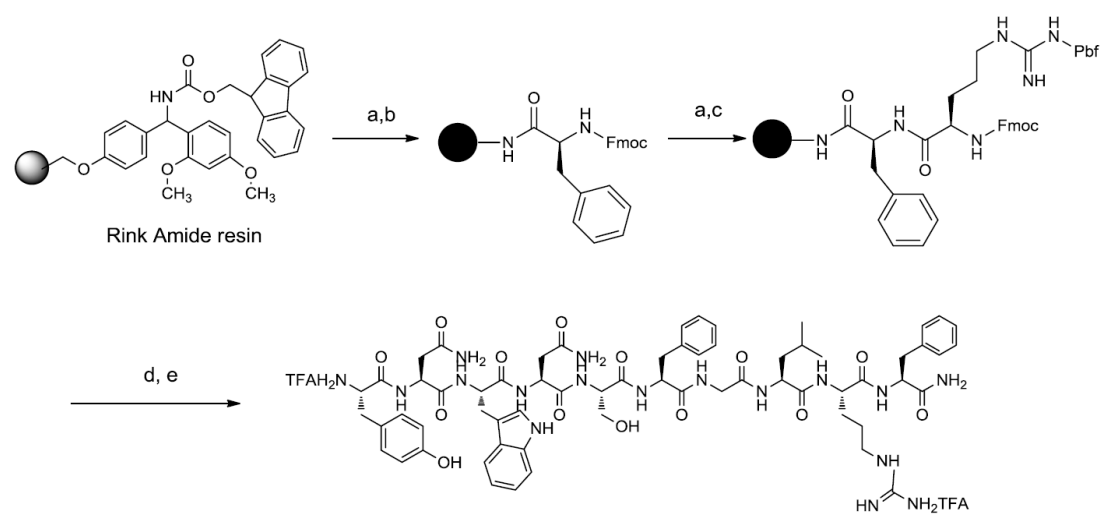

Scheme S1: Synthesis of Kisspeptin-10. Reagents and conditions: a. Piperidine 20% in DMF; b. Fmoc-Phe-OH, HOBt/TBTU, DIPEA, DMF; c. Fmoc-Arg(Pbf)-OH, HOBt/TBTU, DIPEA, DMF; d. cycles of Fmoc-deprotection/repeated couplings; e. TFA/H<sub>2</sub>O/TIPS 95:2.5:2.5.
